# Supplementary material for: Chiral Ag(i) and Pt(ii) complexes of ditopic NHC ligands: synthesis, structural and spectroscopic properties
Source: Royal Society of Chemistry journal article supplement (doi:10.1039/c2dt31740k), 2012-01-01
Supplement: c2dt31740k.pdf [file c2dt31740k.pdf]

## Supplementary Material

Chiral Au(I) and Pt(II) complexes of ditopic NHC ligands:  
synthesis, structural, spectroscopic and photophysical properties

Paul Marshall, Robert L. Jenkins, William Clegg, Ross W. Harrington, Samantha K. Callear,  
Simon J. Coles, Ian A. Fallis\* and Athanasia Dervisi\*

3.esp

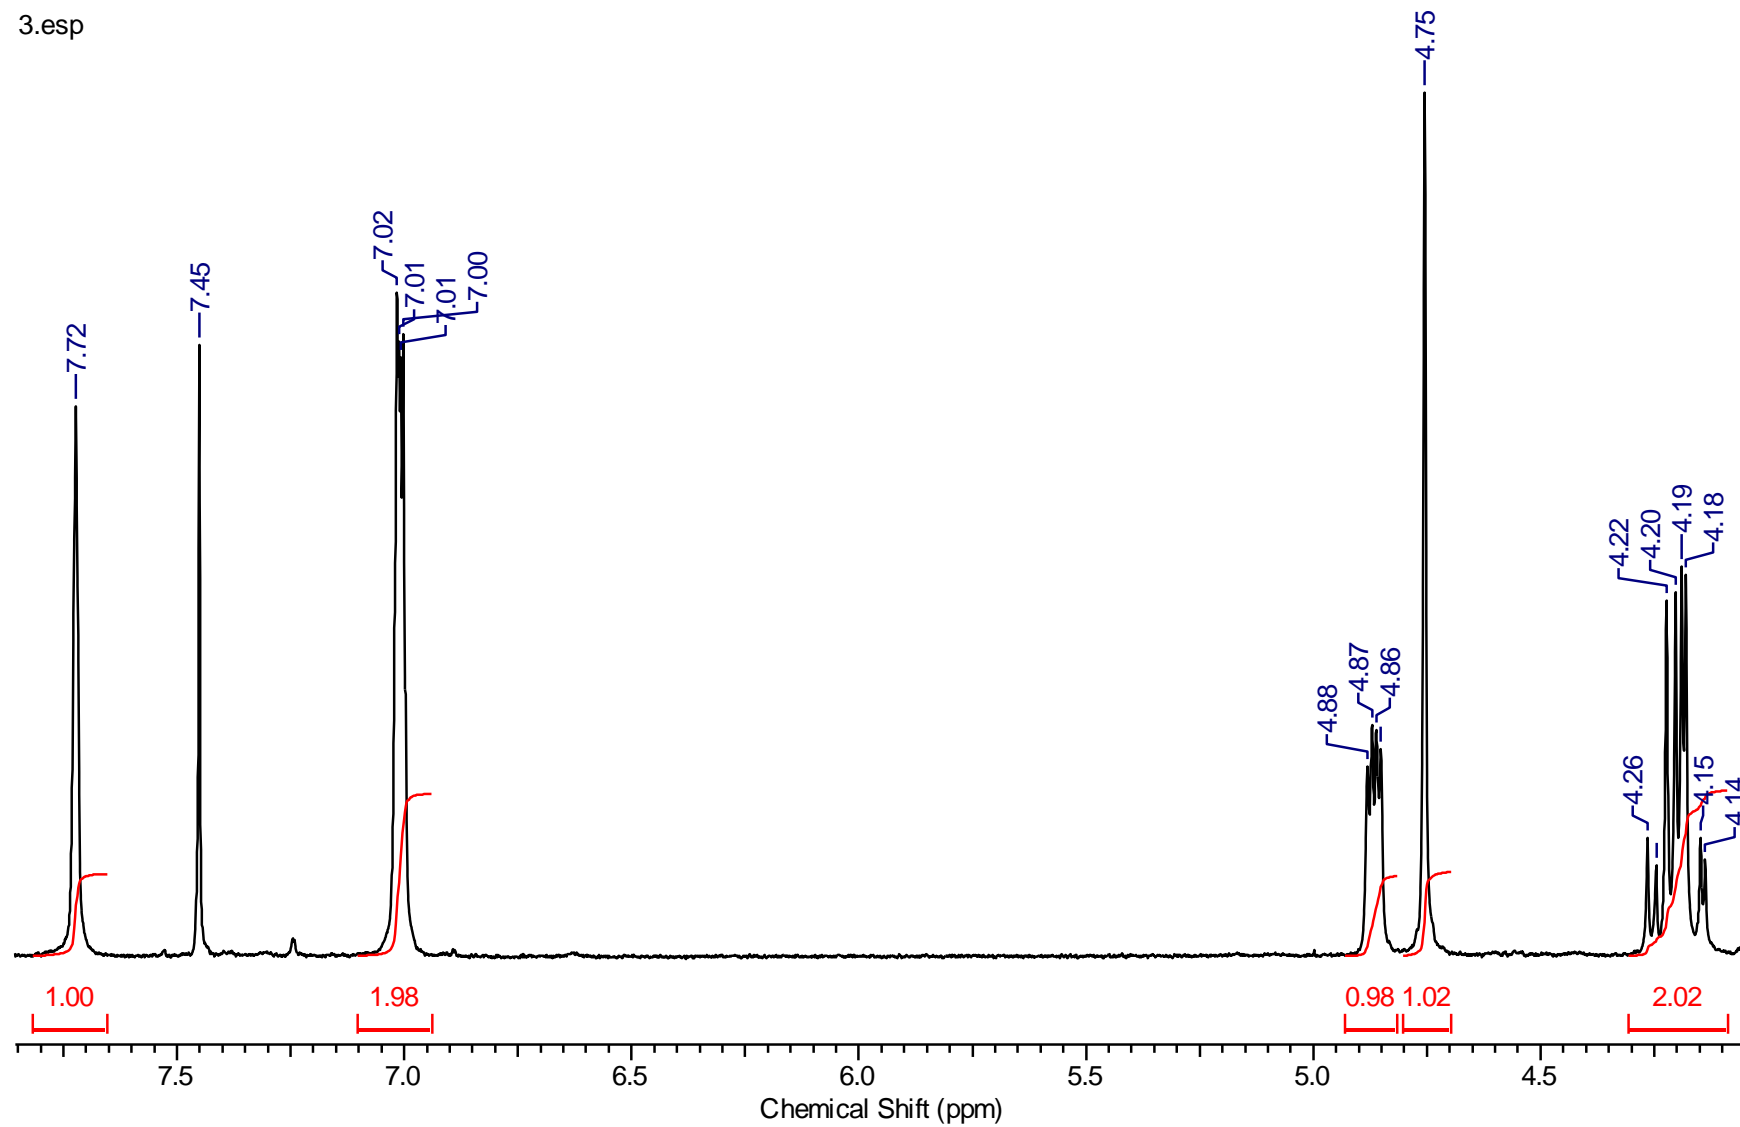

**Figure S1.**  $^1\text{H}$  NMR spectrum of **3** in  $\text{CDCl}_3$ .

4l.esp

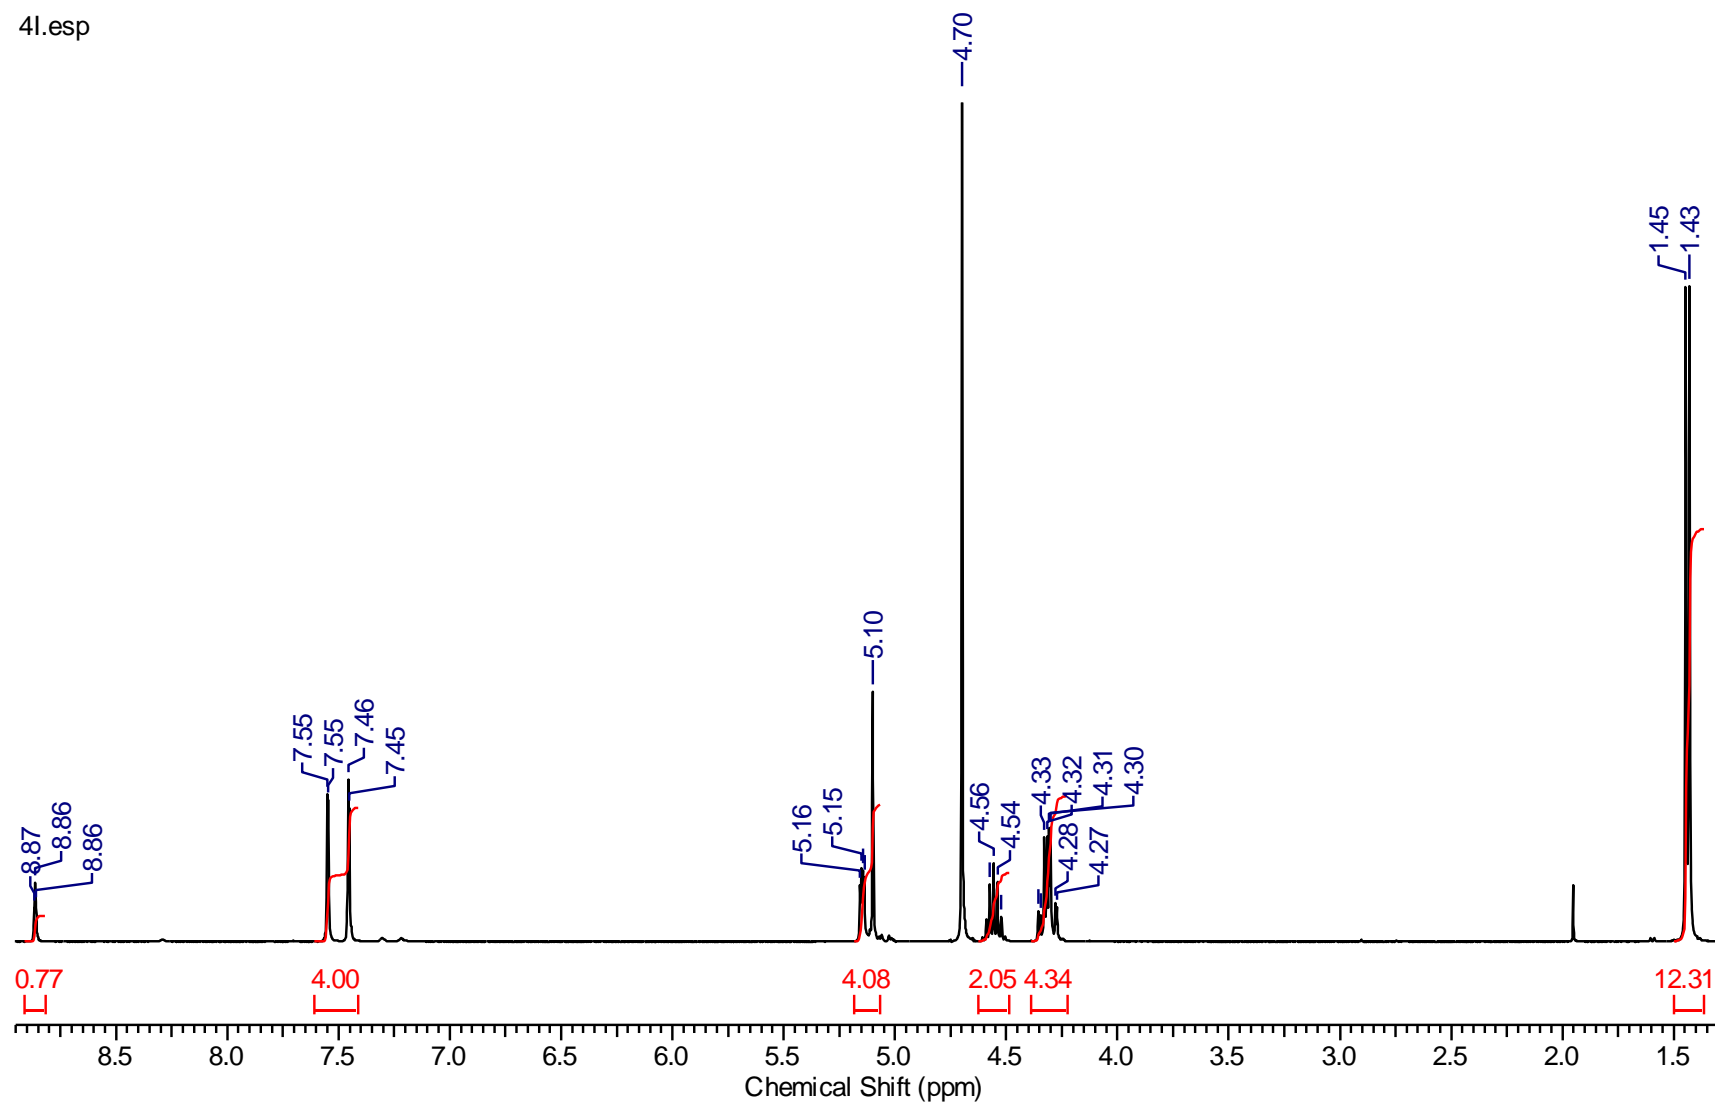

Figure S2.  $^1\text{H}$  NMR spectrum of **4I** in  $\text{D}_2\text{O}$ .

5Br.esp

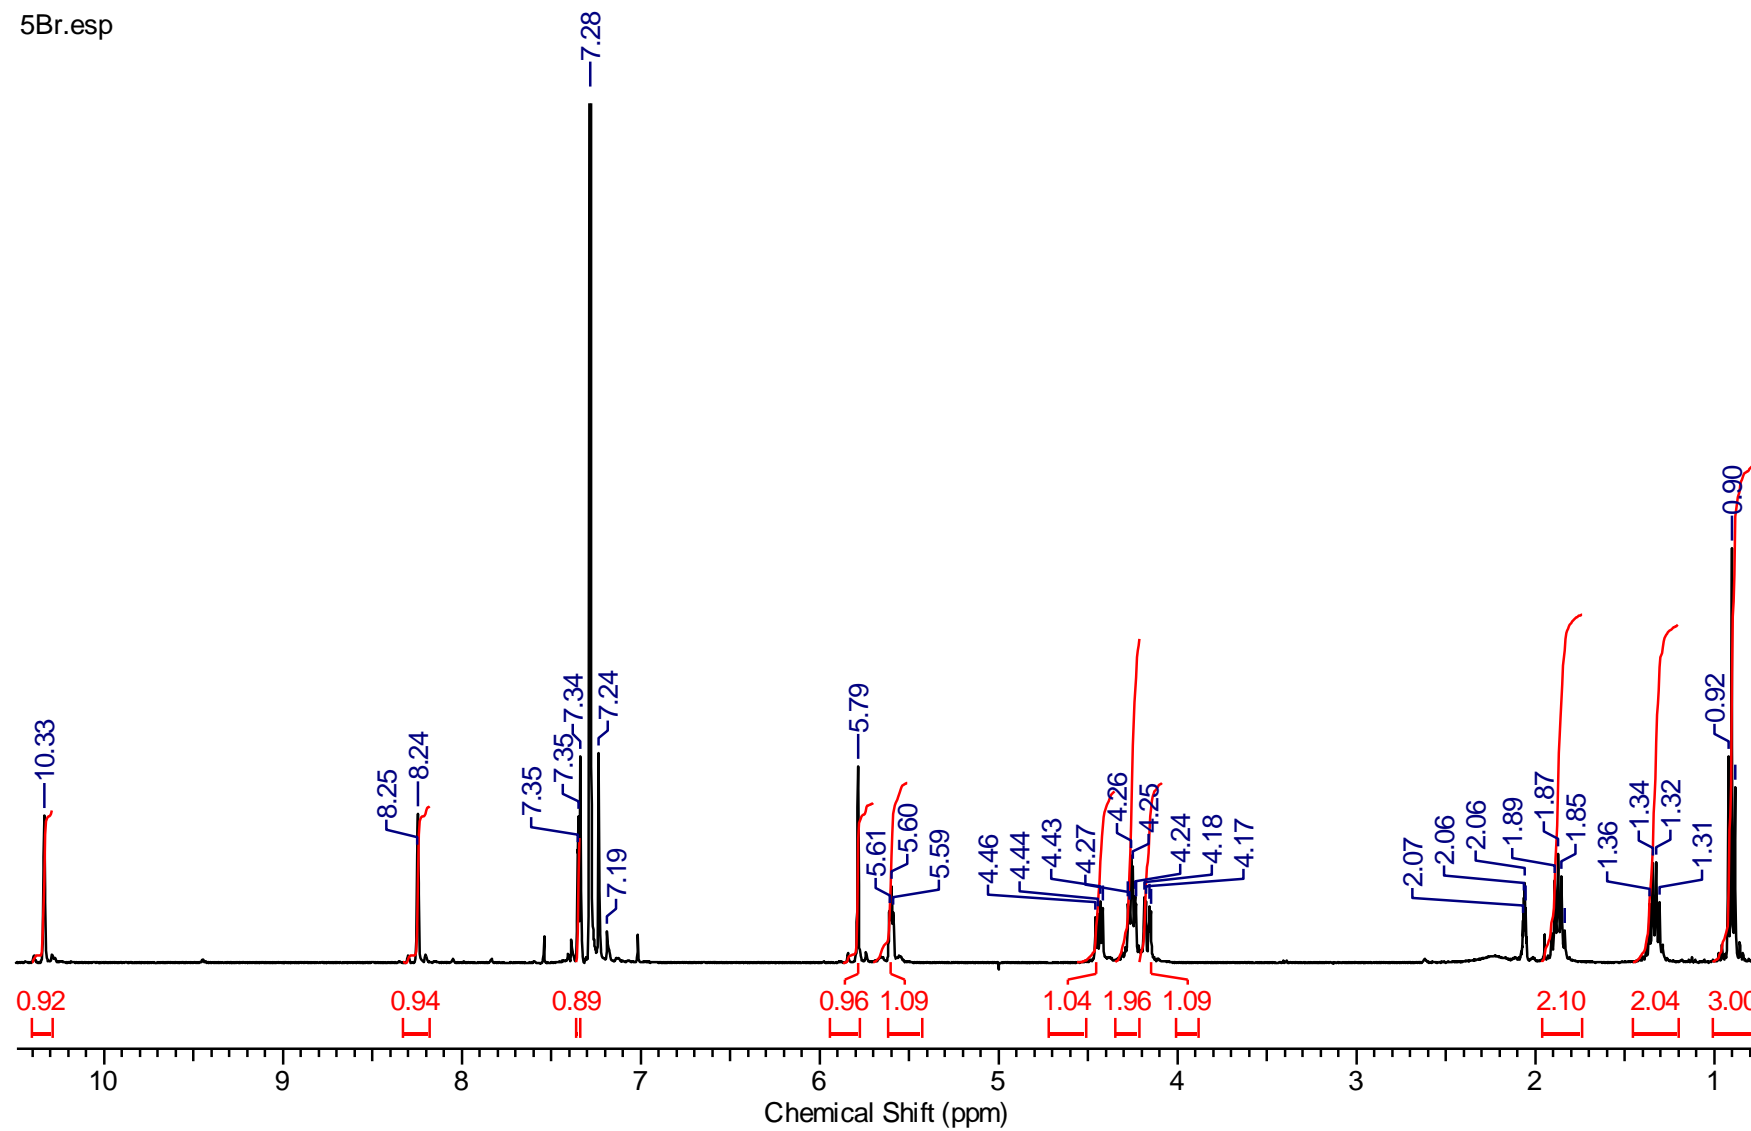

Figure S3. <sup>1</sup>H NMR spectrum of 5Br in CDCl<sub>3</sub>.

7Br.esp

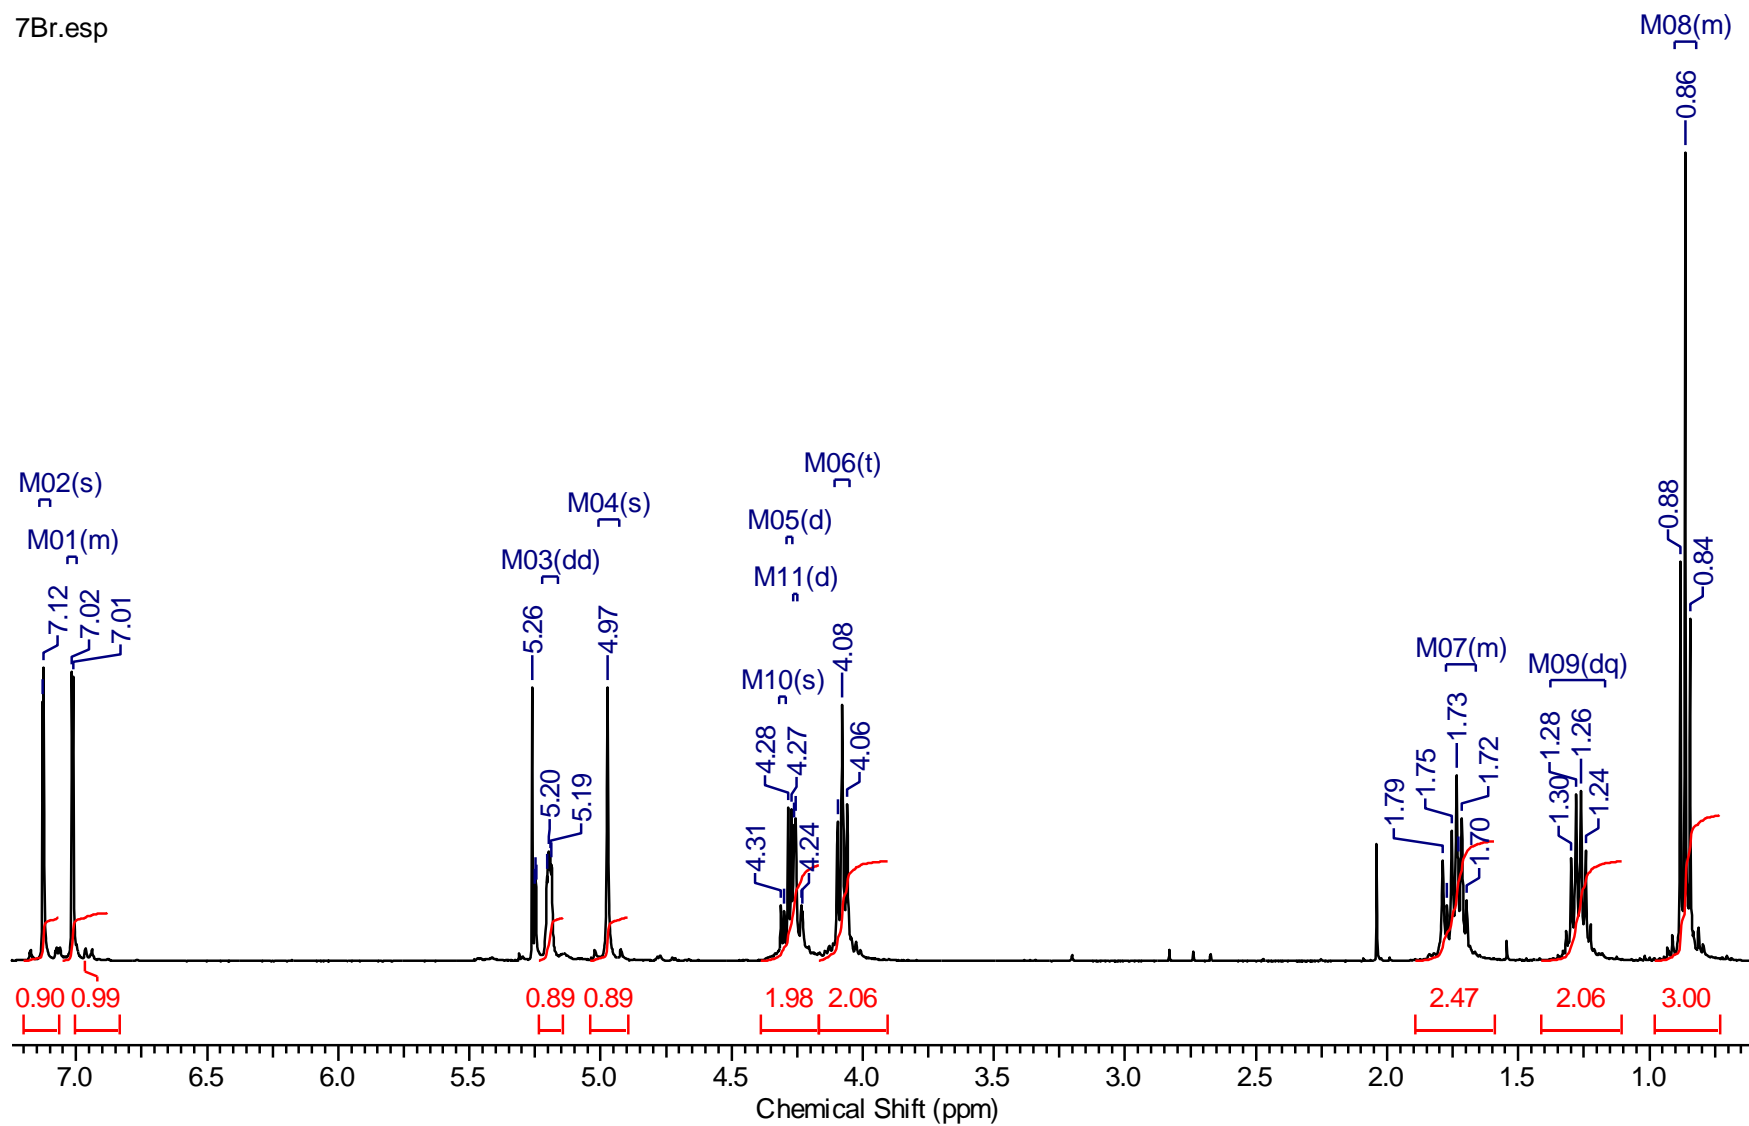

Figure S4. <sup>1</sup>H NMR spectrum of 7Br in CD<sub>2</sub>Cl<sub>2</sub>.

ND327Pt.010.001.1r.esp

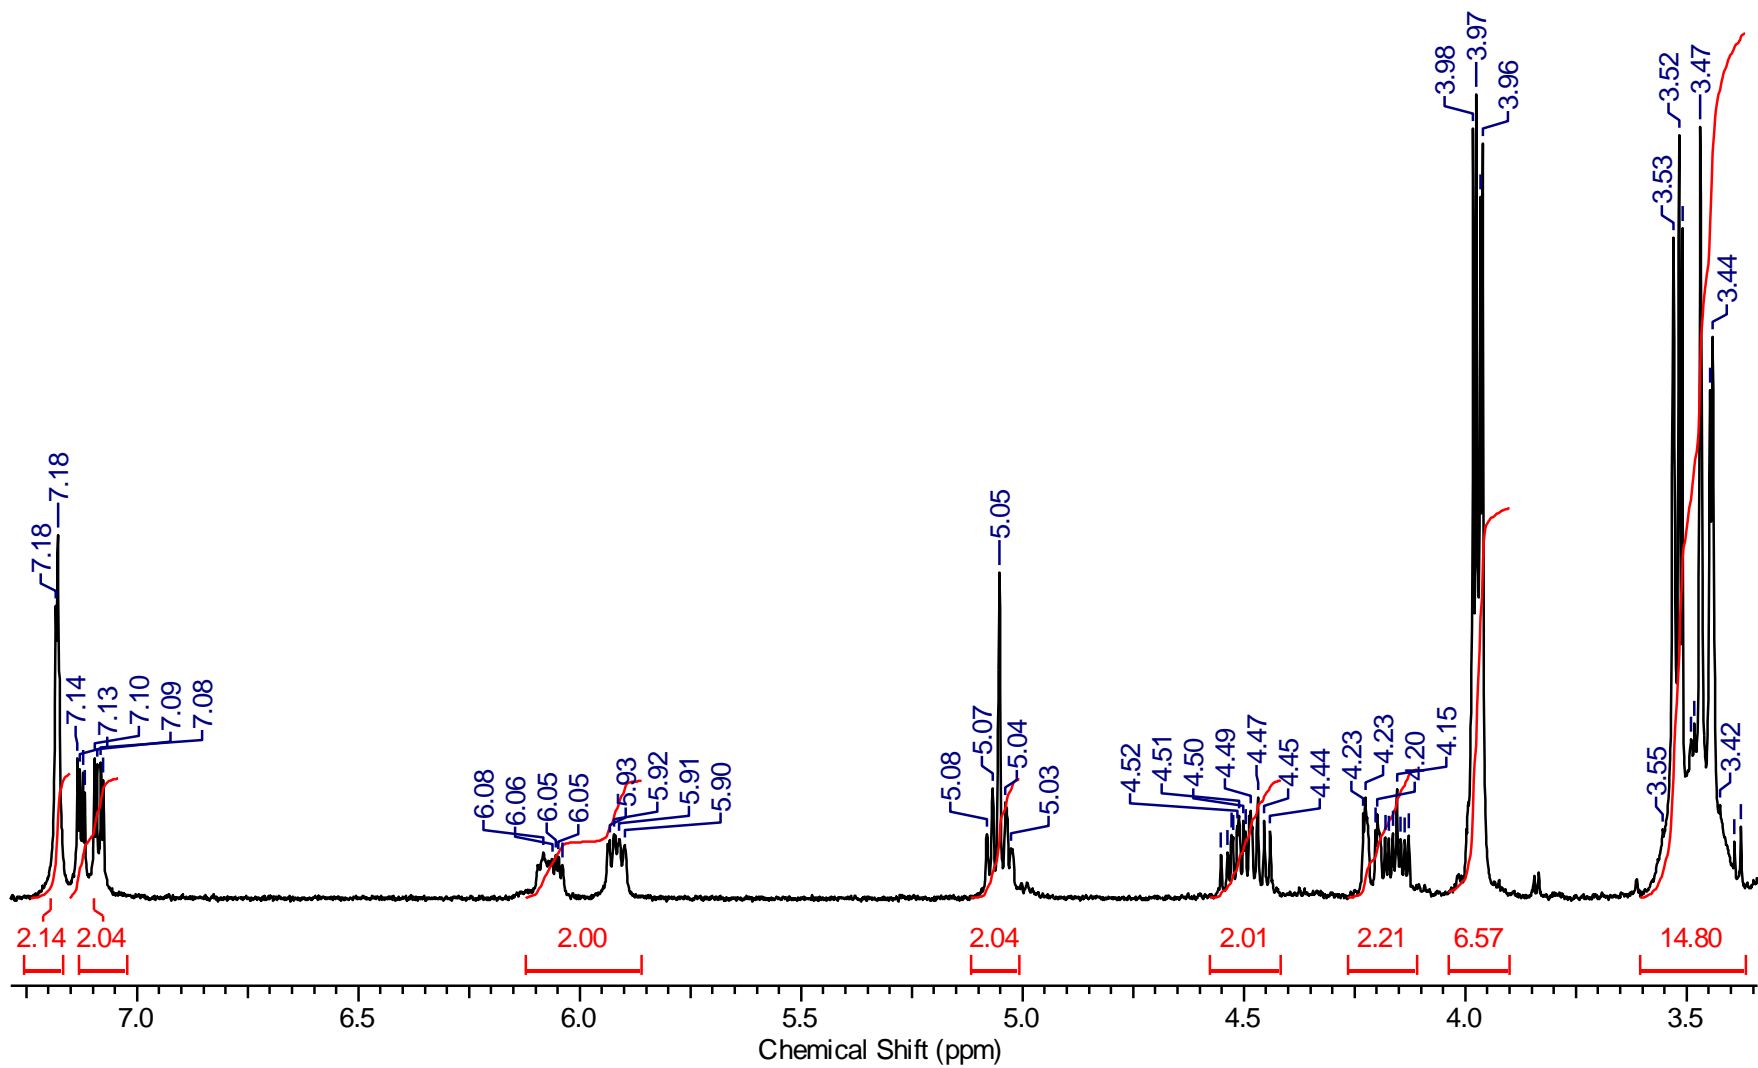

Figure S5. <sup>1</sup>H NMR spectrum of **8** in CD<sub>3</sub>CN.

ND325DCM.esp

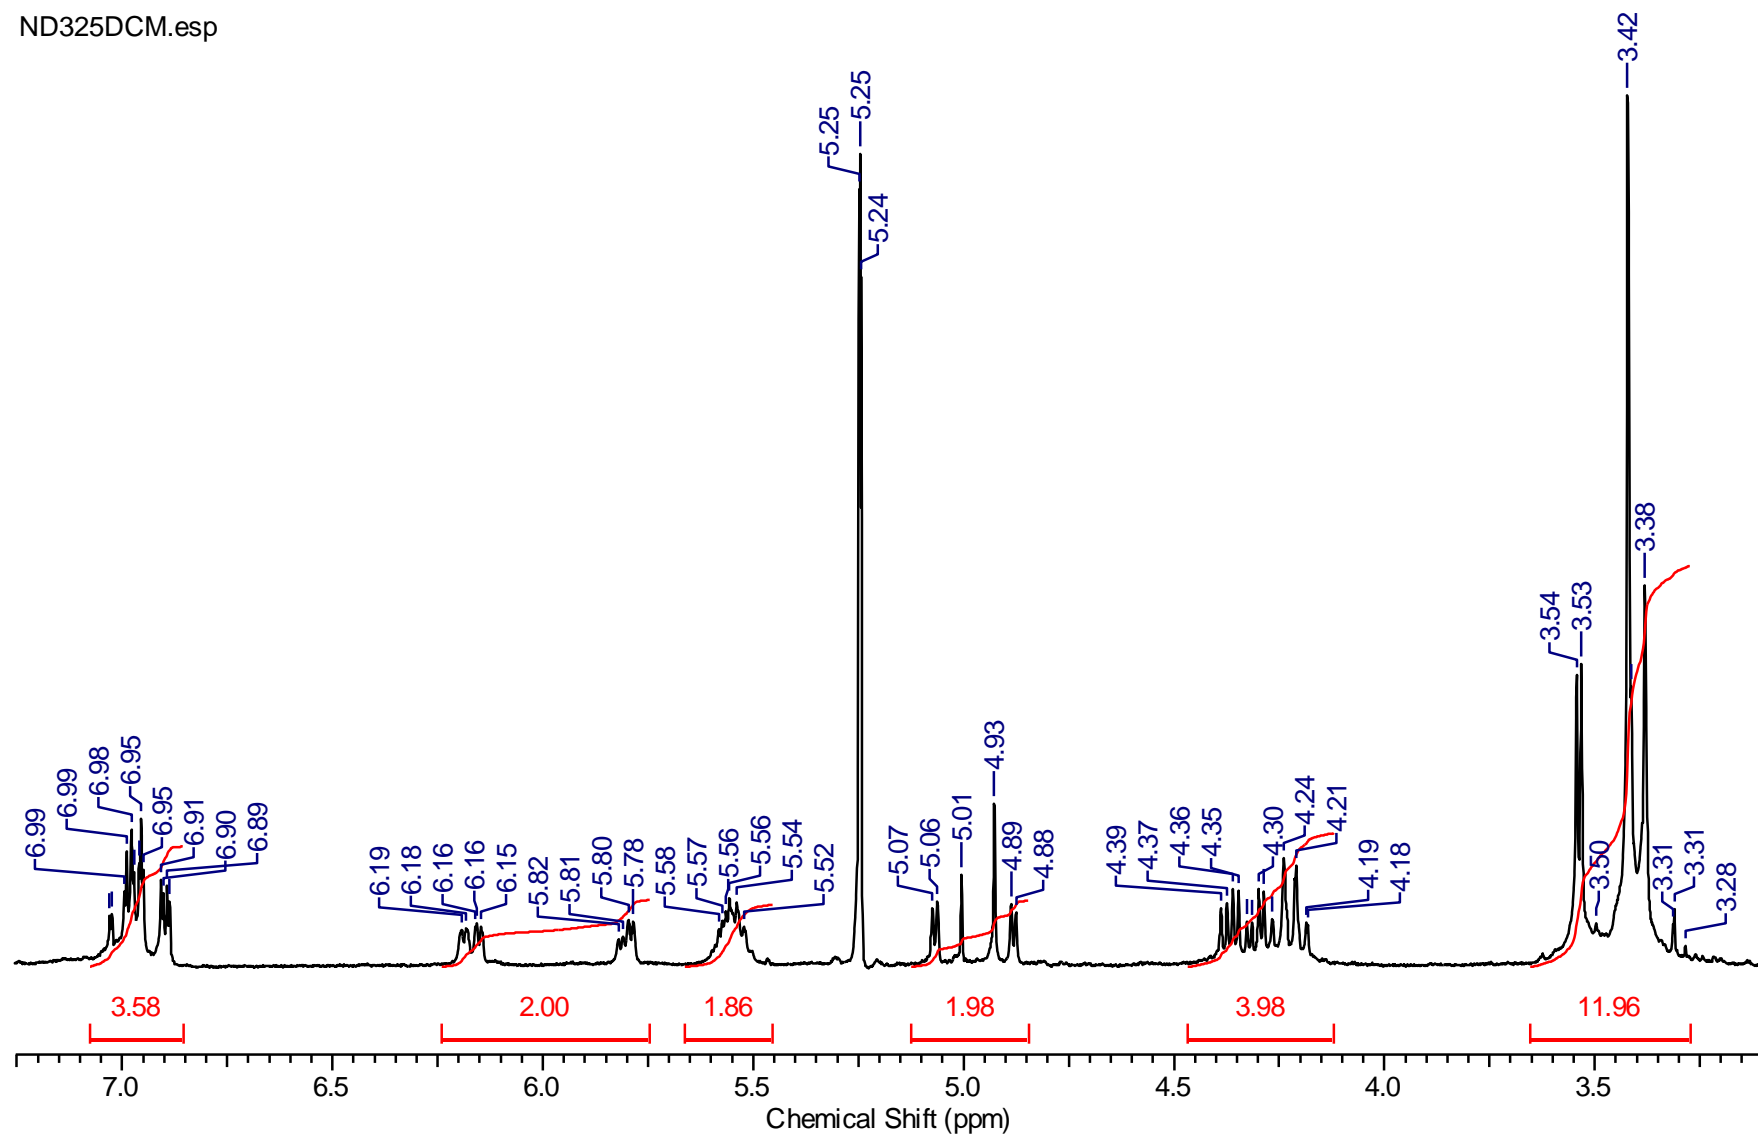

Figure S6.  $^1\text{H}$  NMR spectrum of **9** in  $\text{CD}_2\text{Cl}_2$ .

400\_ND465Pt5.010.001.1r.esp

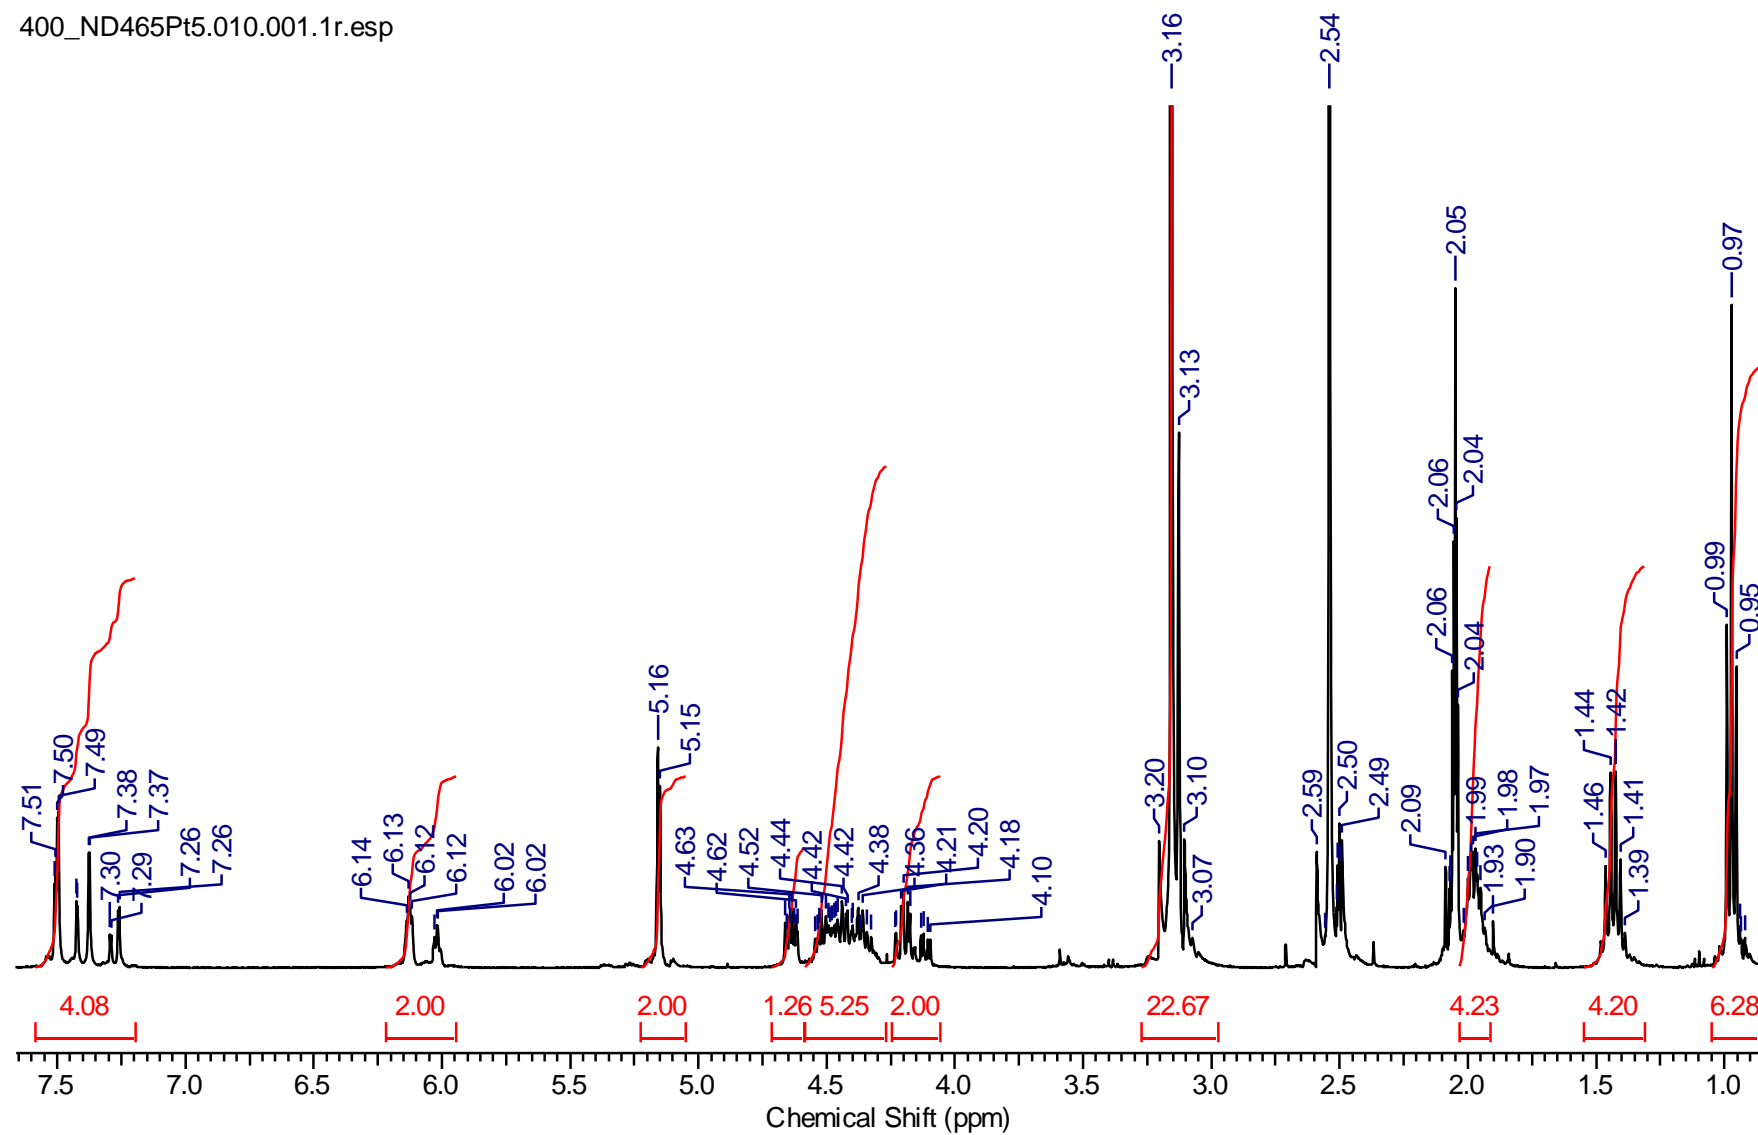

Figure S7. <sup>1</sup>H NMR spectrum of 10 in CD<sub>3</sub>CN/dms0-d<sub>6</sub>.



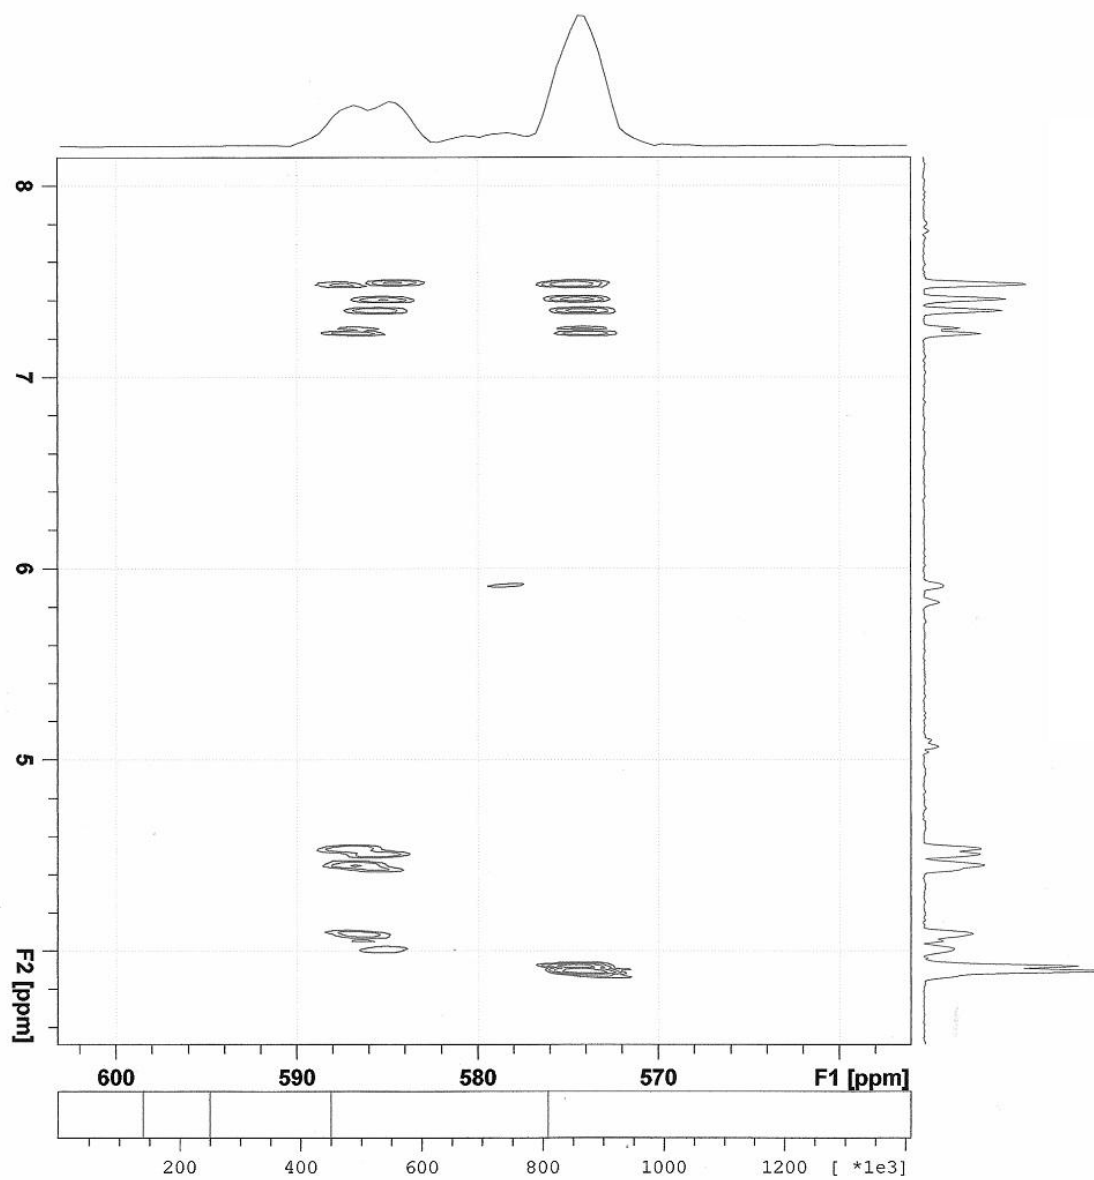

**Figure S8.**  $^1\text{H}$ - $^{15}\text{N}$  HMBC NMR 2D-spectrum of **8** in  $\text{dms0-d}_6$ .

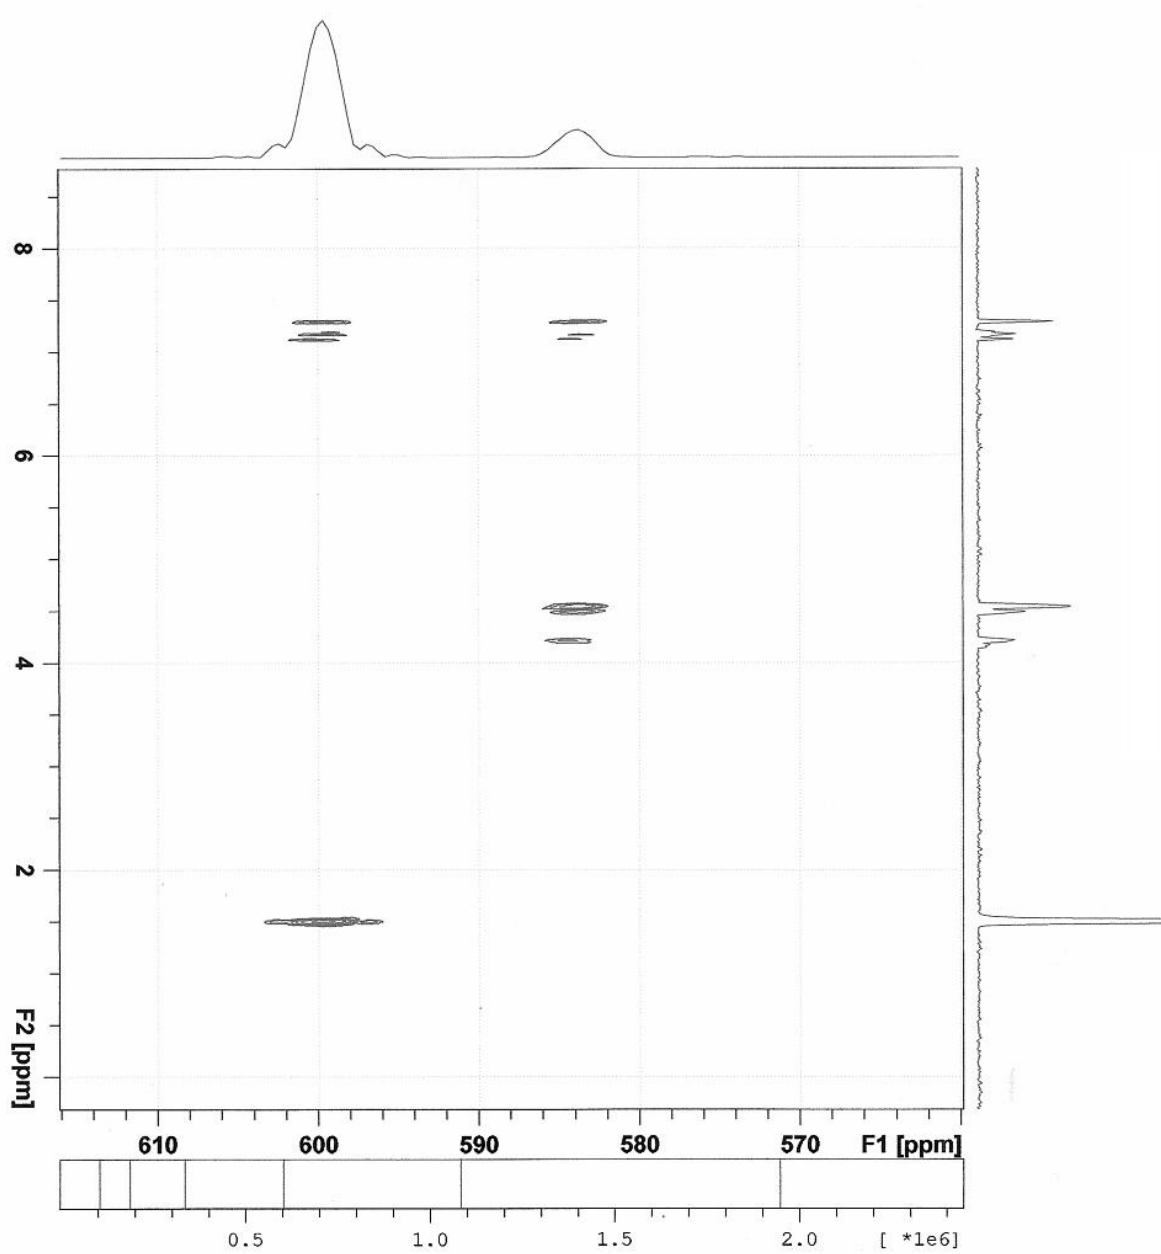

**Figure S9.** <sup>1</sup>H-<sup>15</sup>N HMBC NMR 2D-spectrum of **9** in CD<sub>3</sub>CN.
